# Supplementary material for: Povidone-Iodine Attenuates Viral Replication in Ocular Cells: Implications for Ocular Transmission of RNA Viruses
Source: MDPI journal article supplement (doi:10.3390/biom11050753), 2021-05-18
Supplement: s1 [file s1]

Supplementary materials

# Povidone Iodine Attenuates Viral Replication in Ocular Cells: Implications for Ocular Transmission of RNA Viruses

Sneha Singh <sup>1</sup>, Onkar B. Sawant <sup>2</sup>, Shahzad I. Mian <sup>3</sup> and Ashok Kumar <sup>1,4,\*</sup>

**Citation:** Singh, S.; Sawant, O.B.; Mian, S.I.; Kumar, A. Povidone Iodine Attenuates Viral Replication in Ocular Cells: Implications for Ocular Transmission of RNA Viruses. *Biomolecules* **2021**, *11*, 753. <https://doi.org/10.3390/biom11050753>

<sup>1</sup> Department of Ophthalmology, Visual and Anatomical Sciences, Kresge Eye Institute, Wayne State University School of Medicine, Detroit, MI, USA

<sup>2</sup> Center for Vision and Eye Banking Research, Eversight, Cleveland, OH, USA

<sup>3</sup> Kellogg Eye Center, Department of Ophthalmology and Visual Sciences, University of Michigan, Ann Arbor, MI, USA

<sup>4</sup> Department of Biochemistry, Microbiology, and Immunology, Wayne State University School of Medicine, Detroit, MI, USA

\* Correspondence: akuma@med.wayne.edu

Academic Editor: Hemant Khanna

Received: 08 April 2021

Accepted: 12 May 2021

Published: 18 May 2021

**Publisher's Note:** MDPI stays neutral with regard to jurisdictional claims in published maps and institutional affiliations.

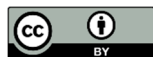

**Copyright:** © 2021 by the authors. Licensee MDPI, Basel, Switzerland. This article is an open access article distributed under the terms and conditions of the Creative Commons Attribution (CC BY) license (<http://creativecommons.org/licenses/by/4.0/>).

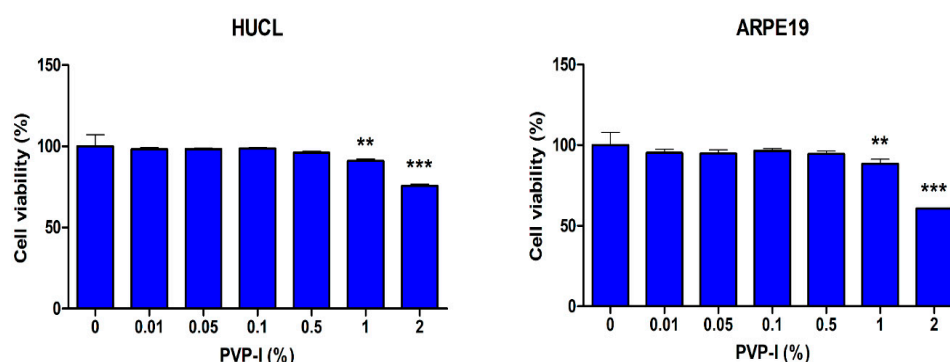

**Figure S1: Assessment of cytotoxic effects of PVP-I on cultured ocular cells.** HUCL and ARPE-19 cells were seeded in a 96-well plate followed by exposure to PVP-I at different concentrations for a minute. The cells were washed with 1X PBS (4 times) followed by culture in fresh medium for 24 hours. MTT assay was performed on the cells and expressed and cell viability (%) compared to control untreated cells. .
